# Supplementary material for: TGFβ-induced expression of long noncoding lincRNA Platr18 controls breast cancer axonogenesis
Source: Life Sci Alliance. 2021 Nov 22;5(2):e202101261. doi: 10.26508/lsa.202101261 (PMC8645334; doi:10.26508/lsa.202101261)
Supplement: Supplementary file 2 [file LSA-2021-01261_TableS2.xlsx]

## Sheet: Sheet2
Axon-related factors regulated upon Platr18 overexpression in NMuMG cells
Gene symbol	Total counts	Gene name	Gene type	P-value	FDR step up )	Fold change
ENSMUSG00000008999.7	44.9628	Bmp7	protein_coding	8.59495e-10	6.56758e-08	-3.05265
ENSMUSG00000031217.8	95.2362	Efnb1	protein_coding	6.01836e-08	1.39072e-06	2.12773
ENSMUSG00000017724.14	44.3929	Etv4	protein_coding	2.09225e-05	0.000127497	2.03514
ENSMUSG00000026193.15	172.781	Fn1	protein_coding	7.698e-10	6.09062e-08	2.30957
ENSMUSG00000020950.10	45.1513	Foxg1	protein_coding	6.07903e-07	7.87353e-06	2.22164
ENSMUSG00000061751.16	139.822	Kalrn	protein_coding	4.35585e-09	2.11375e-07	-2.57299
ENSMUSG00000026764.15	80.0285	Kif5c	protein_coding	3.10936e-11	6.3755e-09	-2.93621
ENSMUSG00000025885.18	63.6577	Myo5b	protein_coding	1.81877e-10	2.11822e-08	-4.97108
ENSMUSG00000022883.11	60.9996	Robo1	protein_coding	2.35717e-05	0.000140523	-2.90901
ENSMUSG00000000627.15	53.7442	Sema4f	protein_coding	5.16931e-12	1.98039e-09	47.5379
