# Supplementary material for: TGFβ-induced expression of long noncoding lincRNA Platr18 controls breast cancer axonogenesis
Source: Life Sci Alliance. 2021 Nov 22;5(2):e202101261. doi: 10.26508/lsa.202101261 (PMC8645334; doi:10.26508/lsa.202101261)
Supplement: Supplementary file 3 [file LSA-2021-01261_TableS3.xlsx]

## Sheet: Sheet4
Axonogenesis-related factors regulated upon hNRNP E1 silencing in NMuMG cells
Gene symbol	Total counts	Gene name	Gene type	P-value	FDR step up	Fold change
ENSMUSG00000000627.15	89.0169	Sema4f	protein_coding	5.55905e-13	1.14281e-10	249.64
ENSMUSG00000047414.6	93.9919	Flrt2	protein_coding	2.41483e-07	1.80024e-06	103.333
ENSMUSG00000006445.3	1571.81	Epha2	protein_coding	7.62391e-14	2.99717e-11	93.0969
ENSMUSG00000026556.15	61.2345	Vangl2	protein_coding	6.09136e-13	1.21541e-10	58.1713
ENSMUSG00000029765.12	74.8272	Plxna4	protein_coding	1.33185e-12	2.19764e-10	42.6682
ENSMUSG00000048482.14	262.533	Bdnf	protein_coding	4.0322e-14	2.02842e-11	9.62684
ENSMUSG00000015619.10	15.4126	Gata3	protein_coding	6.40175e-08	6.13683e-07	6.4534
ENSMUSG00000039239.14	53.1778	Tgfb2	protein_coding	8.48888e-10	2.09795e-08	5.91712
ENSMUSG00000025810.9	621.118	Nrp1	protein_coding	2.21451e-11	1.46568e-09	3.57189
ENSMUSG00000028289.12	178.204	Epha7	protein_coding	4.8087e-11	2.52052e-09	3.28657
ENSMUSG00000020950.10	434.874	Foxg1	protein_coding	2.81718e-08	3.25307e-07	3.21385
ENSMUSG00000045136.6	395.466	Tubb2b	protein_coding	9.6603e-12	7.99213e-10	2.37962
ENSMUSG00000029844.9	59.4052	Hoxa1	protein_coding	5.76221e-07	3.6145e-06	2.32179
ENSMUSG00000029207.16	389.46	Apbb2	protein_coding	2.11932e-10	7.48827e-09	2.24221
ENSMUSG00000021819.11	780.497	Zswim8	protein_coding	1.7929e-08	2.28629e-07	2.16054
ENSMUSG00000061731.9	1673.21	Ext1	protein_coding	1.90338e-10	6.82782e-09	2.01028
ENSMUSG00000045039.9	738.161	Megf8	protein_coding	2.31547e-07	1.74632e-06	-2.07939
ENSMUSG00000030539.13	399.962	Sema4b	protein_coding	8.13014e-09	1.22295e-07	-2.25475
ENSMUSG00000051650.11	115.505	B3gnt2	protein_coding	0.000750285	0.00172862	-2.51375
ENSMUSG00000053646.13	375.551	Plxnb1	protein_coding	5.24114e-09	8.57802e-08	-2.75281
ENSMUSG00000050199.13	280.58	Lgr4	protein_coding	7.14145e-11	3.307e-09	-2.8625
ENSMUSG00000057969.15	57.711	Sema3b	protein_coding	1.16917e-06	6.49336e-06	-2.87385
ENSMUSG00000027200.17	23.3208	Sema6d	protein_coding	1.04469e-06	5.91089e-06	-2.92693
ENSMUSG00000059714.13	42.2027	Flot1	protein_coding	2.27775e-07	1.72266e-06	-2.97457
ENSMUSG00000028064.17	140.55	Sema4a	protein_coding	1.18968e-10	4.95141e-09	-3.07245
ENSMUSG00000041936.18	2262.22	Agrn	protein_coding	6.04248e-11	2.97837e-09	-3.41581
ENSMUSG00000051379.12	191.001	Flrt3	protein_coding	3.18927e-12	3.79579e-10	-3.44775
ENSMUSG00000026764.15	73.9456	Kif5c	protein_coding	8.639e-08	7.78831e-07	-8.17575
